# Supplementary material for: Adjuvant chemotherapy with gemcitabine and cisplatin compared to observation after curative intent resection of cholangiocarcinoma and muscle invasive gallbladder carcinoma (ACTICCA-1 trial) - a randomized, multidisciplinary, multinational phase III trial
Source: Springer Nature journal article supplement (doi:10.1186/s12885-015-1498-0), 2015-07-30
Supplement: MOESM1 [file 9744778]

Liste der Ethik-Kommissionen

Zentrum 01 - Universitätsklinikum Hamburg-Eppendorf

Ethik-Kommission der Ärztekammer Hamburg  
Weidestr. 122 b

22083 Hamburg

Zentrum 02 - Universitätsklinikum Aachen

Ethik-Kommission an der Medizinischen Fakultät der RWTH  
Aachen

Pauwelsstr. 30  
52074 Aachen

Zentrum 03 - Charité -Universitätsmedizin Berlin

Ethik-Kommission des Landes Berlin  
Fehrbelliner Platz 1  
10707 Berlin

Zentrum 05 - Universitätsklinikum Carl Gustav Carus

Ethikkommission der Medizinischen Fakultät Carl Gustav Carus der  
Technischen Universität Dresden

Fetscherstr. 74  
01307 Dresden

Zentrum 07 - Universitätsklinikum Essen

Ethik-Kommission der Medizinischen Fakultät der Universität  
Duisburg-Essen

Robert-Koch-Str. 9-11  
45147 Essen

Zentrum 08 - Klinikum der J.W. Goethe-Universität

Ethik-Kommission des Fachbereichs Medizin der Johann Wolfgang  
Goethe-Universität  
Haus 1  
Theodor-Stern-Kai 7  
60590 Frankfurt/Main

Zentrum 09 - Medizinische Hochschule Hannover

Ethikkommission der Medizinischen Hochschule Hannover  
Carl-Neuberg-Str. 1  
30625 Hannover

Zentrum 10 - Universitätsklinikum Heidelberg

Ethik-Kommission I der Medizinischen Fakultät Heidelberg  
Alte Glockengießerei 11/1  
69115 Heidelberg

Zentrum 11 - Universitätsklinikum des Saarlandes

Ethik-Kommission der Ärztekammer des Saarlandes  
Faktoreistr. 4  
66111 Saarbrücken

Zentrum 12 - Universitätsklinikum Jena

Ethik-Kommission der Friedrich-Schiller-Universität Jena an der  
Medizinischen Fakultät  
Gebäude 1  
Bachstr. 18  
07740 Jena

Zentrum 13 - Universitätsklinikum Leipzig

Geschäftsstelle der Ethik-Kommission an der Medizinischen  
Fakultät der Universität Leipzig  
Haus: Karl-Sudhoff-Institut  
Käthe-Kollwitz-Straße 82  
04109 Leipzig

Zentrum 15 - Klinikum der Johannes-Gutenberg Universität Mainz

Ethik-Kommission bei der Landesärztekammer Rheinland-Pfalz  
Deutschhausplatz 3  
55116 Mainz

Zentrum 16 - Universitätsklinikum Mannheim

Med. Ethik-Kommission II der Medizinischen Fakultät Mannheim  
der Universität Heidelberg, Universitätsmedizin Mannheim  
Maybachstr. 14  
68169 Mannheim

Zentrum 17 - Klinikum der Universität München- Campus  
Großhadern

Ethikkommission der Med. Fakultät der LMU München  
Pettenkoferstraße 8  
80336 München

Zentrum 18 - Universitätsklinikum Regensburg

Ethikkommission der Medizinischen Fakultät der Universität  
Regensburg, Klinikum der Universität Regensburg  
Franz-Josef-Strauß Allee 11  
93053 Regensburg

Zentrum 19 - Universitätsklinikum Tübingen

Ethik-Kommission an der Medizinischen Fakultät der Eberhard-  
Karls-Universität und am Universitätsklinikum Tübingen  
Gartenstr. 47  
72074 Tübingen

Zentrum 20 - Universitätsklinikum Ulm

Ethikkommission der Universität Ulm  
Helmholtzstr. 20  
89081 Ulm

Zentrum 21 - Universitätsklinikum Würzburg

Ethik-Kommission bei der Medizinischen Fakultät der Universität  
Würzburg  
Versbacher Str. 9  
97078 Würzburg

Zentrum 22 - Universitätsklinikum Freiburg

Ethik-Kommission der Albert-Ludwigs-Universität Freiburg  
Engelberger Str. 21  
79106 Freiburg
